# Supplementary material for: The Robo4 cytoplasmic domain is dispensable for vascular permeability and neovascularization
Source: PubMed Central journal article supplement (PMC5123080; doi:10.1038/ncomms13517), 2016-11-24
Supplement: ncomms13517-s1.pdf [file ncomms13517-s1.pdf]

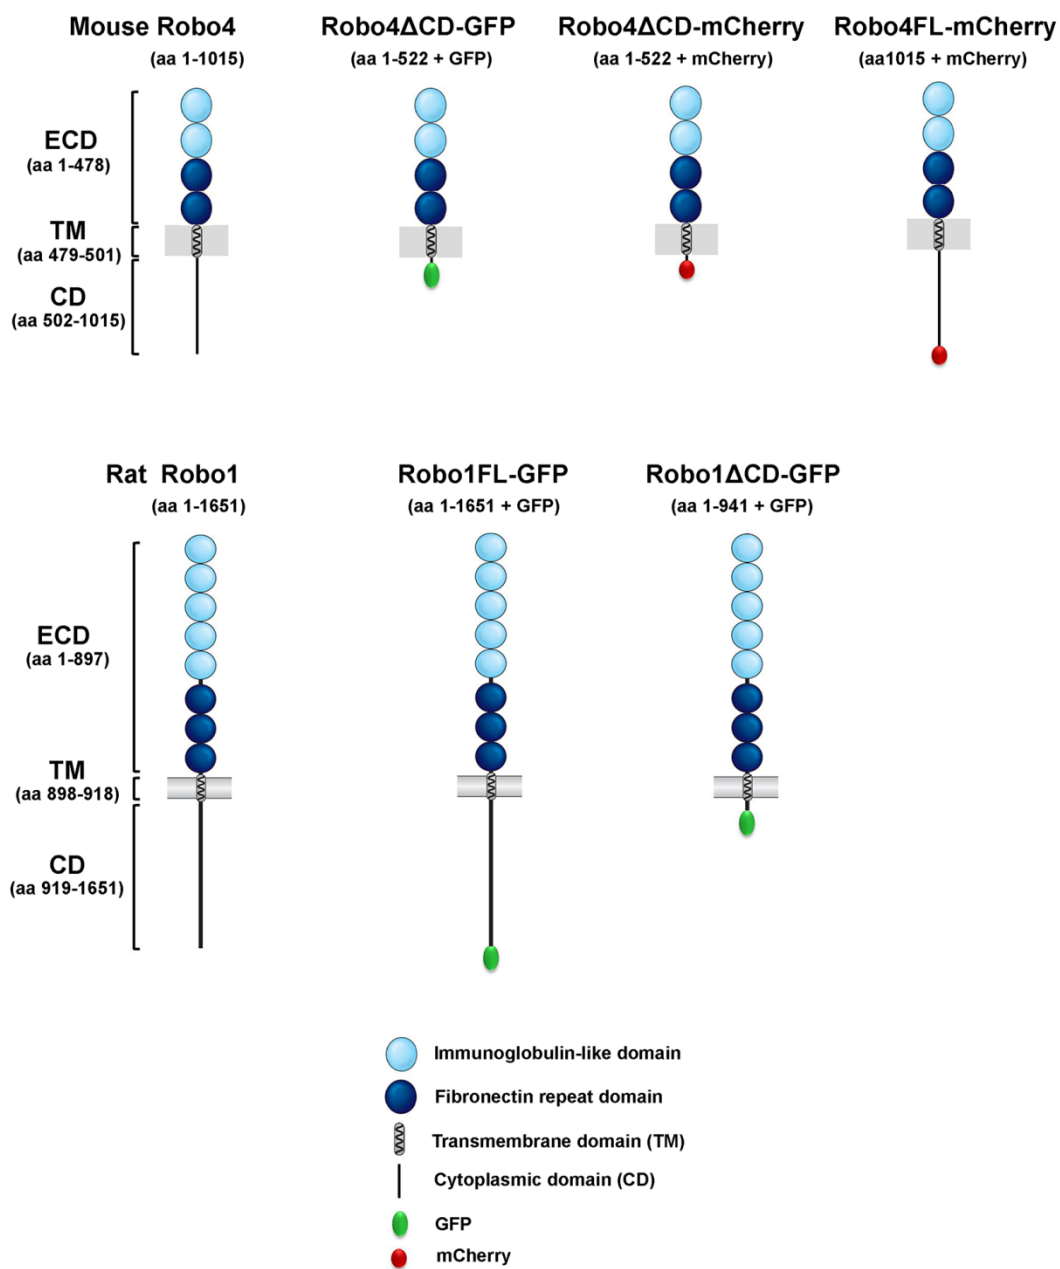

**Supplementary Fig. 1. Schematic diagram showing Robo constructs used in the study.**

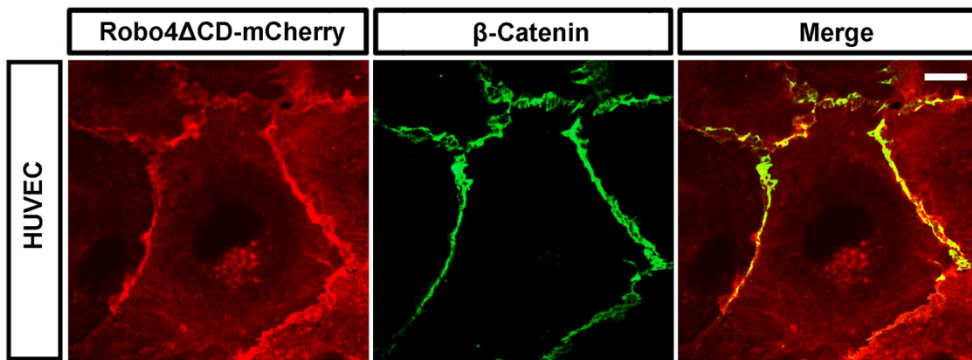

**Supplementary Fig. 2. Membrane and junctional labelling of HUVECs infected with Robo4 $\Delta$ CD-mCherry adenovirus counterstained with anti- $\beta$ -catenin antibody. Scale bar: 10  $\mu$  m.**

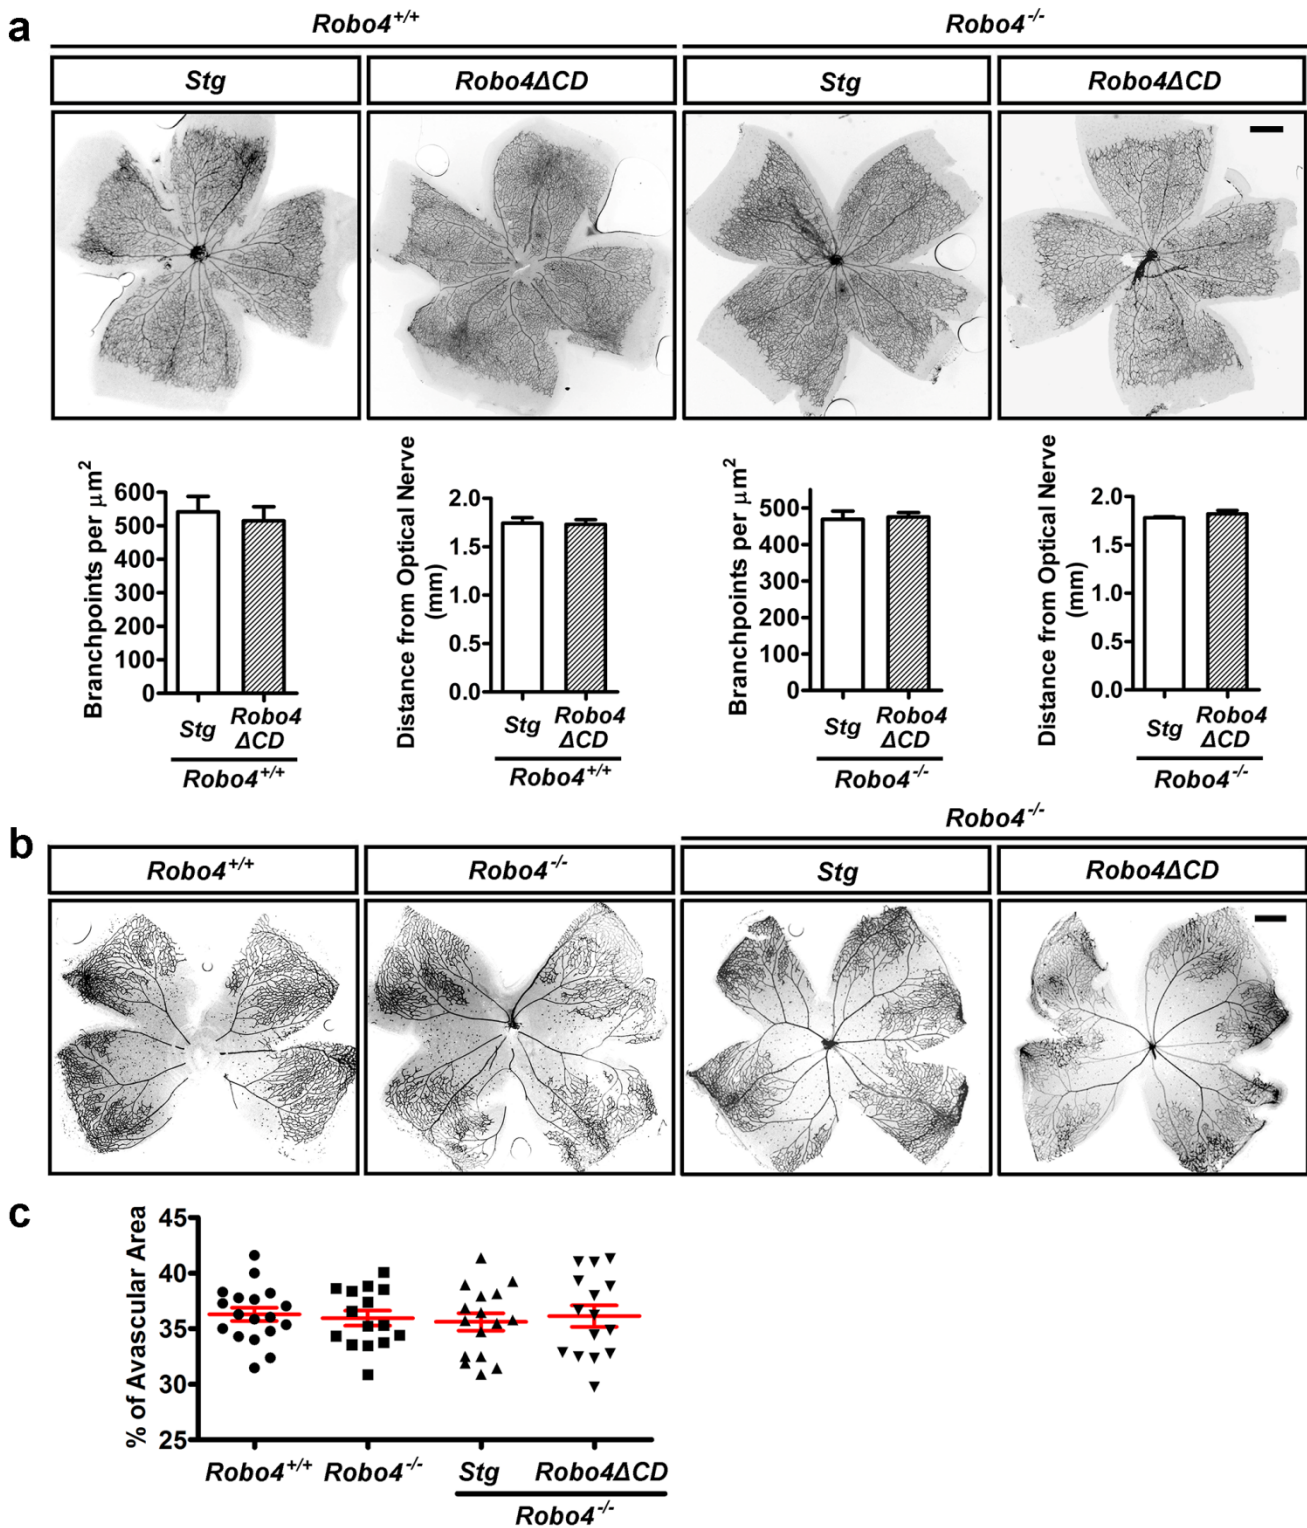

**Supplementary Fig. 3. *Robo4ΔCD* does not affect developmental retinal angiogenesis and hyperoxia-induced vaso-obliteration.**

**(a)** Developmental retinal angiogenesis analysis. Upper panel: IsoB4-stained P7 retinal flat mounts of mice with the indicated genotypes. Lower panel: quantifications of number of branchpoints and vascular progression of the retina vasculature. N= 4-10 mice in each group. Error bars: S.E.M. No significant differences were observed using Mann-Whitney U test.

**(b)** Robo4 or Robo4 $\Delta$ CD does not affect vaso-obliteration in retina after OIR. IsoB4 stained P12 retinal flat mounts of mice with the indicated genotypes after 5 days of 75% hyperoxia exposure.

**(c)** Quantifications of avascular area in the retinas shown in **(b)**. Each dot represents a retina. N= 15-18 retinas (8-9 mice) per group. Error bars: S.E.M. No significant differences were observed using Mann-Whitney U test.



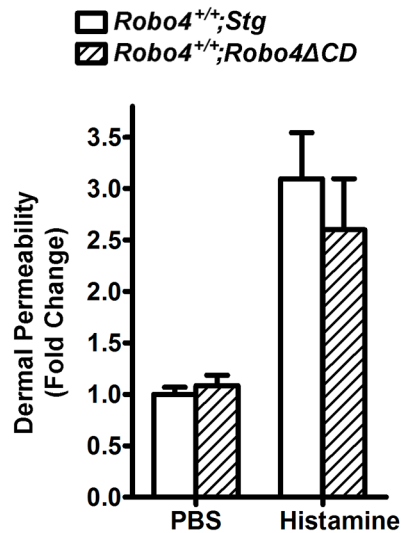

#### Supplementary Fig. 4. Dermal permeability analysis.

Quantifications of Evans blue dye in the skin 30 min after histamine stimulation. N= 8-11 mice per group. Error bars: S.E.M. Histamine induced dermal permeability was not significantly different between *Robo4*<sup>+/+</sup>; *Stg* and *Robo4*<sup>+/+</sup>; *Robo4*Δ*CD* mice, as determined using Mann-Whitney U test.

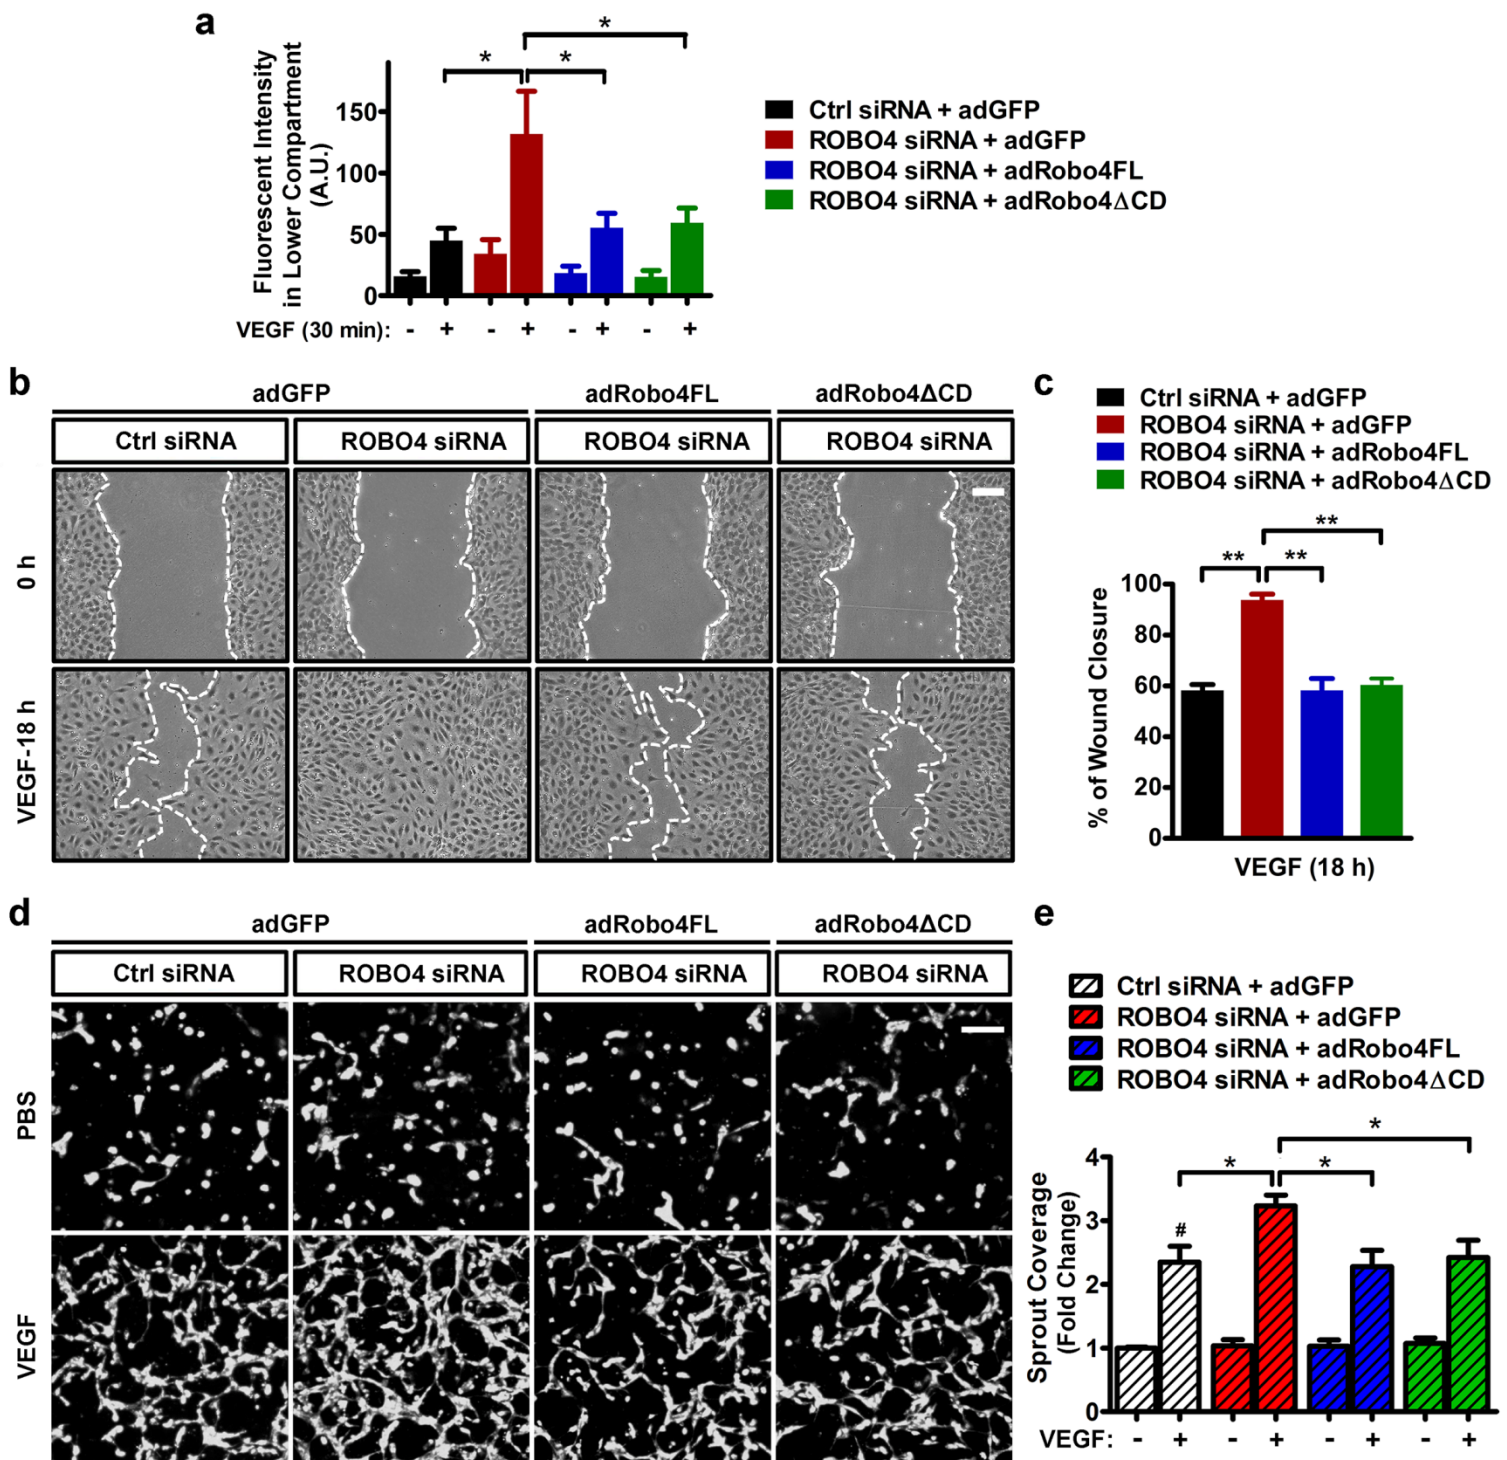

**Supplementary Fig. 5. Robo4  $\Delta$  CD inhibits VEGF-induced HUVEC monolayer permeability, wound closure and vascularisation in 3D fibrin gels.**

**(a)** HUVEC transwell permeability assay. HUVECs were treated with siRNAs and virus as indicated and cultured for 3 days in transwell inserts. After stimulation with 5 nM VEGF for 30 min, FITC-dextran leakage into the lower compartment of the inserts was assessed. VEGF induced FITC leakage was significantly enhanced by *ROBO4* siRNA. Expression of siRNA resistant Robo4FL and Robo4 $\Delta$ CD in *ROBO4* siRNA transfected cells rescued the enhanced FITC leakage. N=4 experiments. The data represent mean  $\pm$  standard deviation. \*  $p < 0.05$ , Mann-Whitney U test.

**(b-c)** Representative images and quantifications of HUVEC scratch wound healing assay. Cells were treated with siRNAs and virus as indicated and then stimulated with 6 nM VEGF. Images were taken at 0 h and 18 h after scratching. VEGF induced migration was significantly enhanced by *ROBO4* siRNA and decreased in Robo4FL and Robo4 $\Delta$ CD transfected cells. N=6 scratches in 3 independent experiments. Error bars: S.E.M. \*\*,  $p < 0.01$ , Mann-Whitney U test.

**(d-e)** HUVEC sprouting in 3D fibrin gels and the corresponding quantification. Cells were treated with siRNAs and virus as indicated and then stimulated with 6 nM VEGF for 120 h. #: VEGF significantly induces HUVEC sprouting in 3D fibrin gels. VEGF induced sprouting was significantly enhanced by *ROBO4* siRNA and decreased in Robo4FL and Robo4 $\Delta$ CD transfected cells. N= 4 experiments. Error bars: S.E.M. \*,  $p < 0.05$ , Mann-Whitney U test.

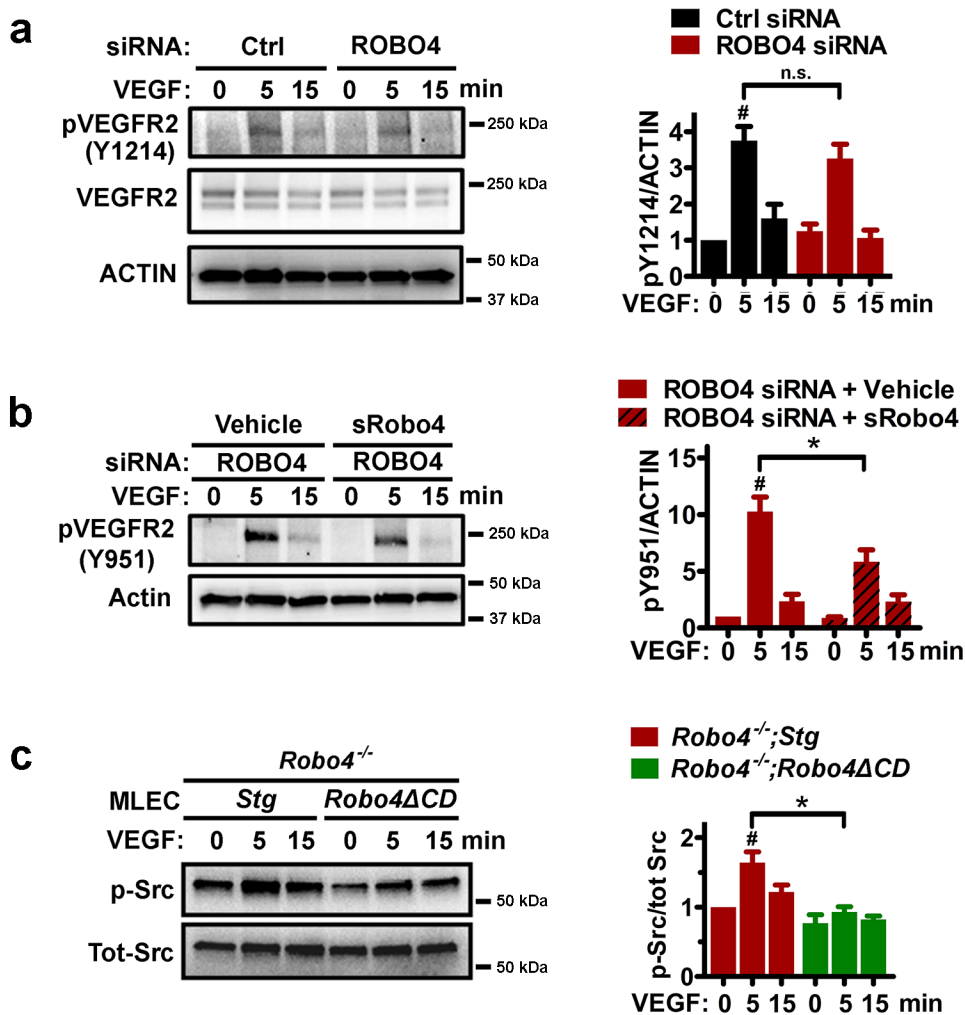

## Supplementary Fig. 6. ROBO4 cytoplasmic domain is dispensable for VEGF signalling.

(a) Western-blot analysis (left) and quantifications (right, n=4) of phospho-VEGFR2 (Y1214) in HUVECs transfected with the indicated siRNAs and treated with 3 nM VEGF. #: VEGF significantly induces pY1214 at 5 min. Error bars: S.E.M. n.s., not significant, Student's *t*-test.

(b) Western blot analysis (left) and quantifications (right, n=5) of phospho-VEGFR2 (Y951) in HUVECs transfected with *ROBO4*siRNA, treated with 100 μg/ml recombinant mouse sRobo4 or vehicle (PBS/0.2 M NaCl) and stimulated with 3 nM VEGF. #: VEGF significantly induces pY951 at 5 min. sRobo4 inhibits excessive pY951 in *ROBO4*-silenced cells. Error bars: S.E.M. \*, *p* < 0.05, Student's *t*-test.

(c) Western-blot analysis (left) and quantifications (right, n=5) of phospho-Src (p-Src) in MLECs of *Robo4*<sup>-/-</sup>;*Stg* and *Robo4*<sup>-/-</sup>;*Robo4*Δ*CD* mice after 6 nM VEGF stimulation. #: VEGF significantly induces p-Src in MLECs of *Robo4*<sup>-/-</sup>;*Stg* mice at 5 min. Src activation is significantly decreased in *Robo4*<sup>-/-</sup>;*Robo4*Δ*CD* mice. Error bars: S.E.M. \*, *p* < 0.05, Student's *t*-test.

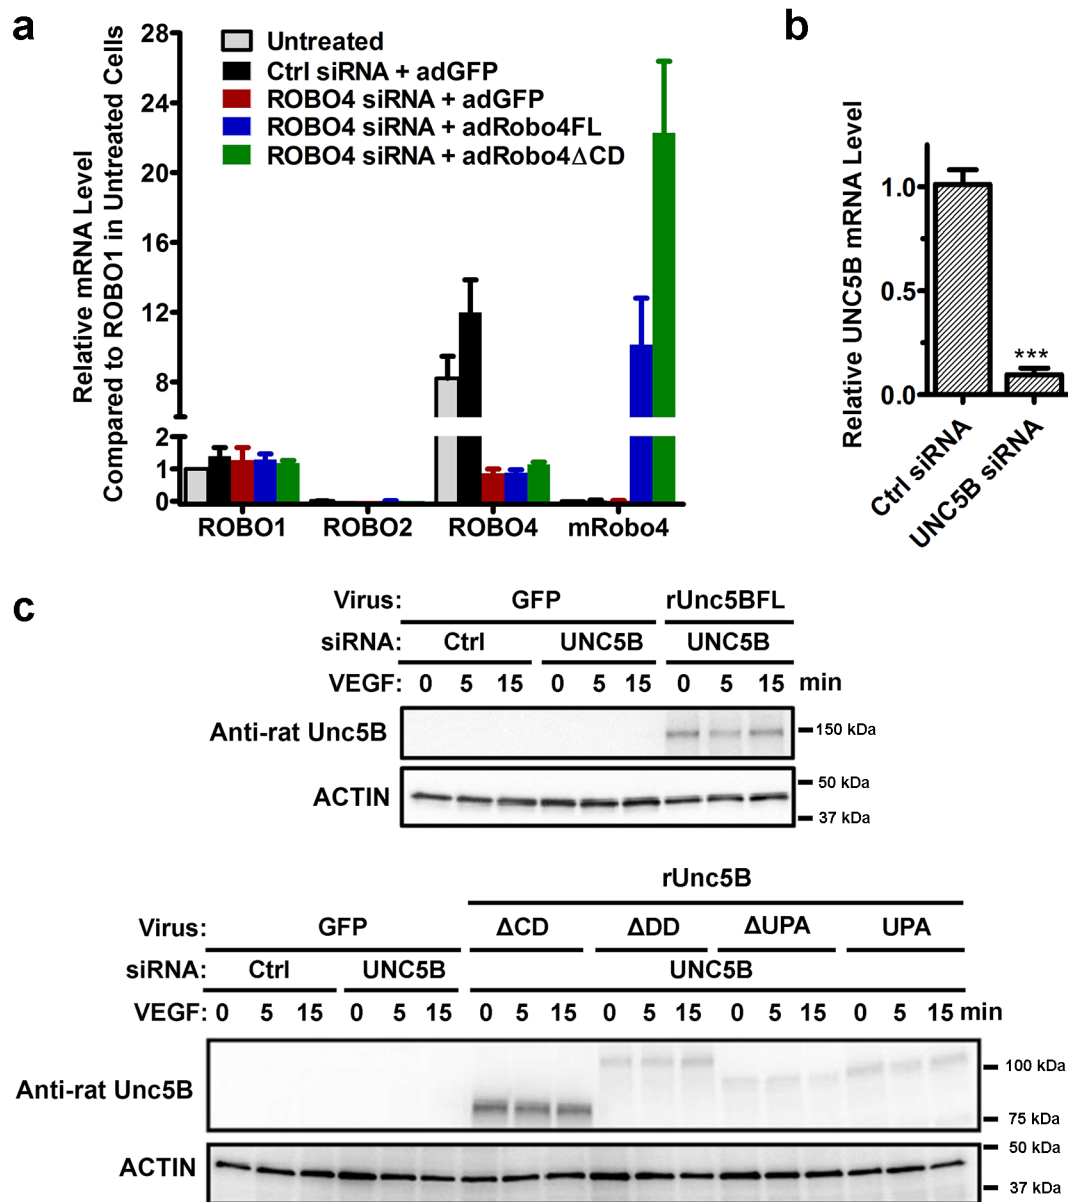

### Supplementary Fig. 7. ROBO4 and UNC5B expression analysis.

**(a)** QPCR analysis of *ROBO* mRNA expression levels in HUVECs transfected with Ctrl or *ROBO4* siRNA and infected by adenovirus containing GFP (adGFP), adRobo4  $\Delta$  CD or adRobo4FL. *ROBO1* mRNA level in untreated HUVECs was set as 1. N=3 experiments.

**(b)** QPCR analysis of *UNC5B* mRNA expression levels in HUVECs transfected with Ctrl or *UNC5B* siRNA. Averaged *UNC5B* mRNA level in Ctrl siRNA transfected HUVECs was set as 1. N=3 independent experiments. Error bars: S.E.M. \*\*\*,  $p < 0.001$ , Student's *t*-test.

**(c)** Western blot analysis of siRNA-resistant rat Unc5BFL (upper panel) and truncated Unc5B (lower panel) in HUVECs with indicated siRNA transfection, adenovirus infection and 3 nM VEGF stimulation. Note that the blots are corresponding to those shown in Fig.7e and 7g.

## Supplementary Fig. 8. Uncropped Immunoblots.

Uncropped Immunoblots for Fig.1c

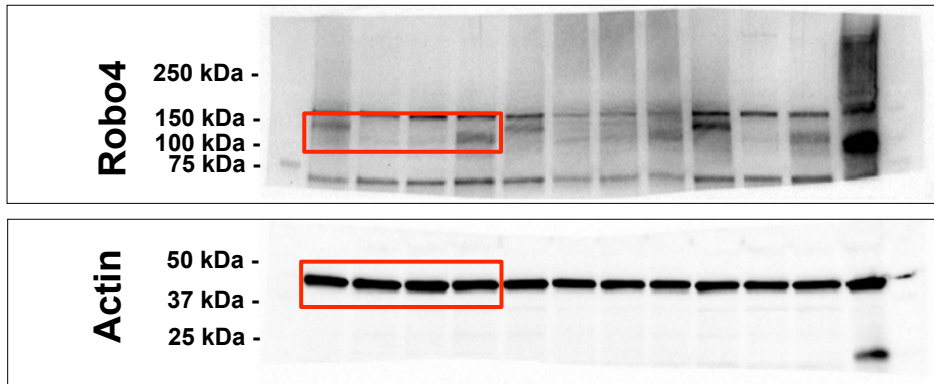

Uncropped Immunoblots for Fig.1e

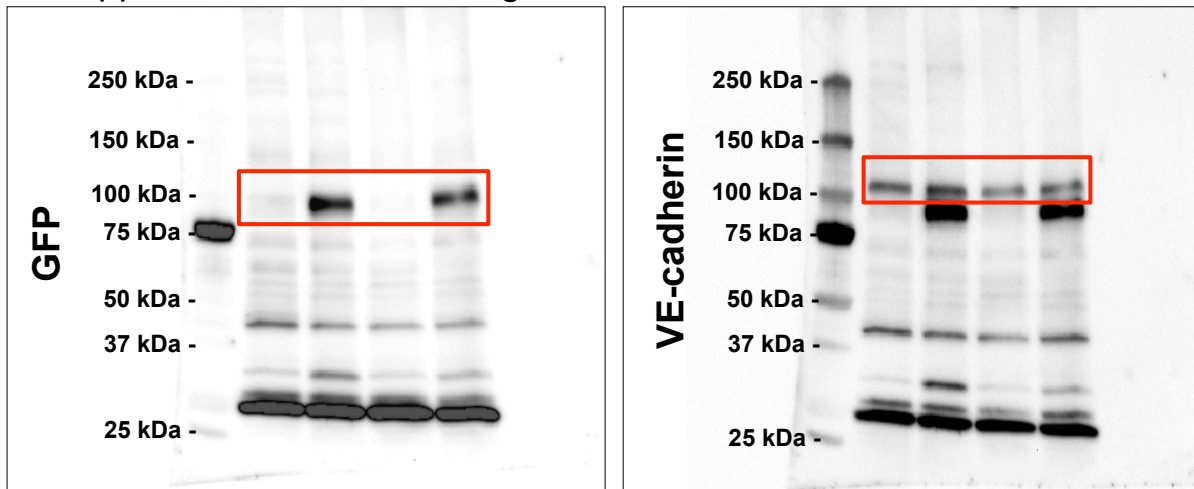



Uncropped Immunoblots for Fig.1j

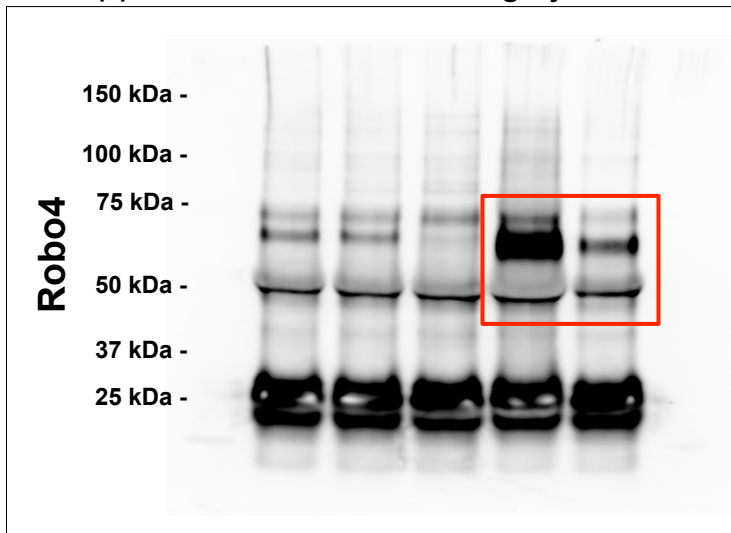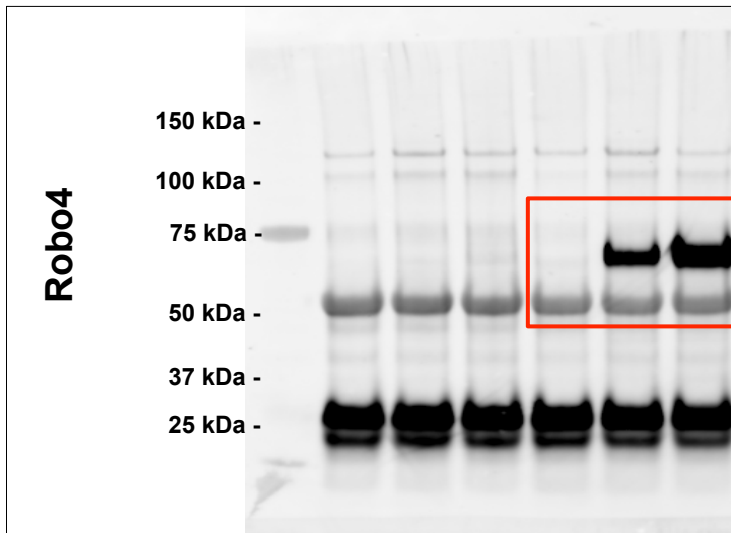

Uncropped Immunoblots for Fig.1k

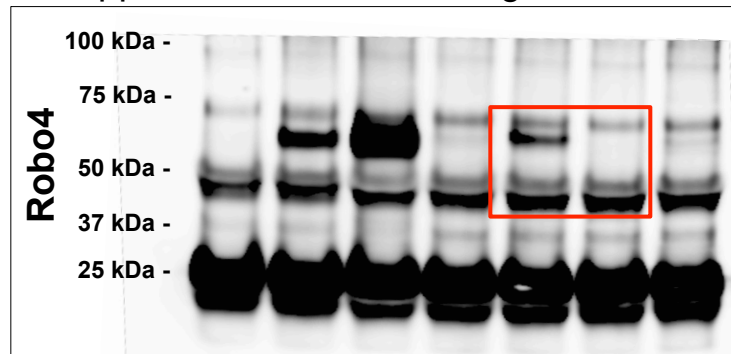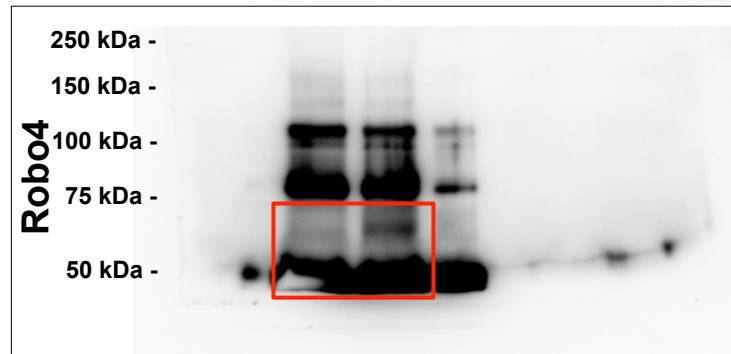



### Uncropped Immunoblots for Fig.5a

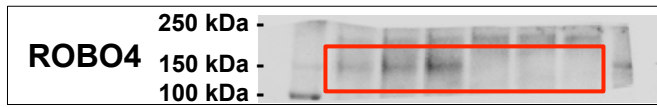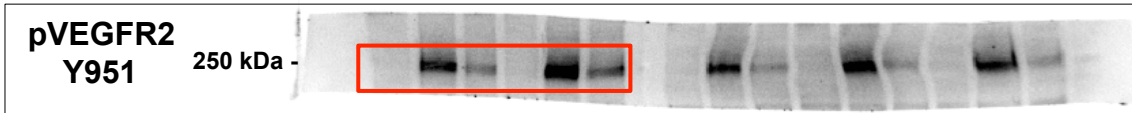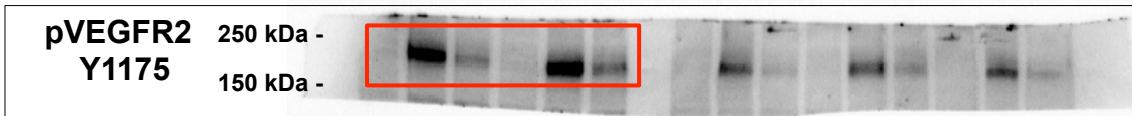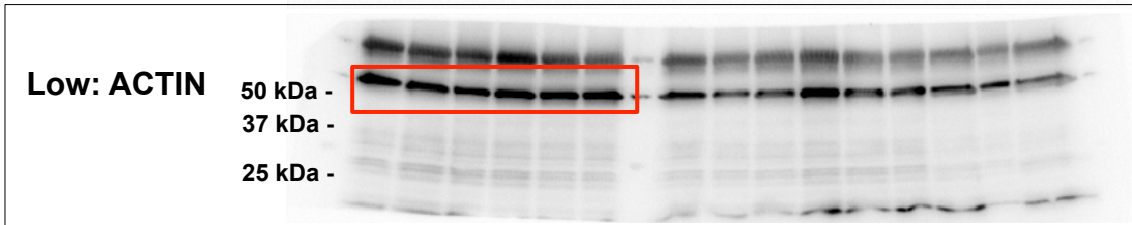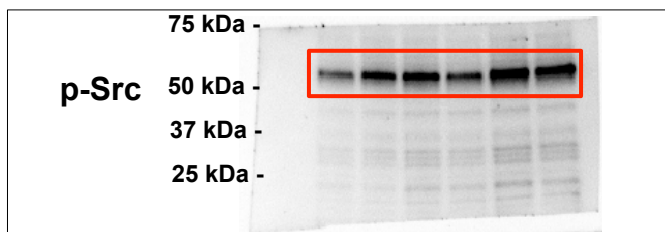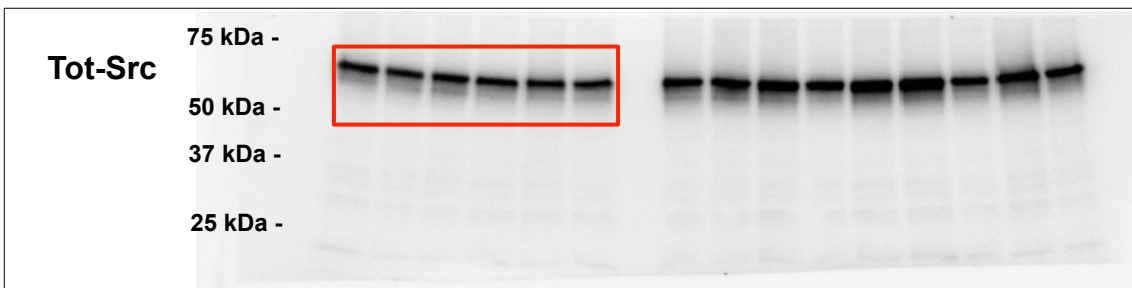

### Uncropped Immunoblots for Fig.5e

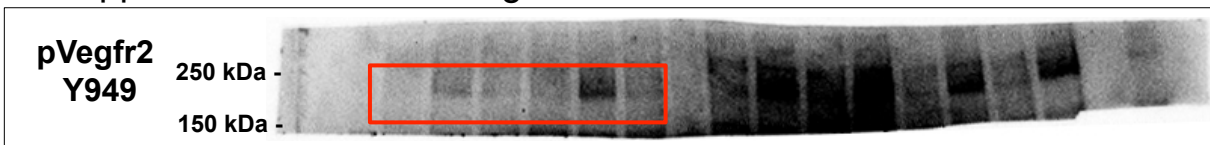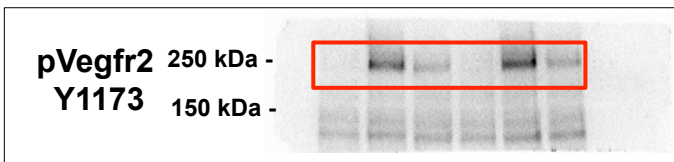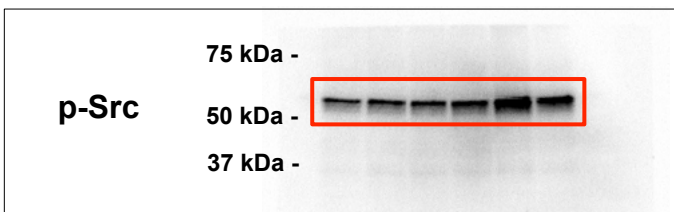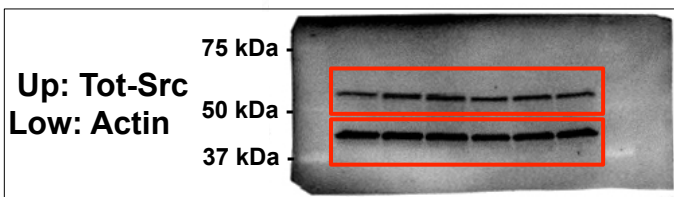

Uncropped Immunoblots for Fig.5i

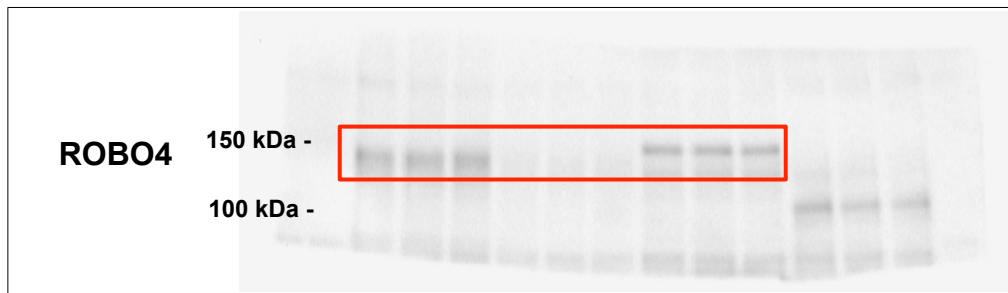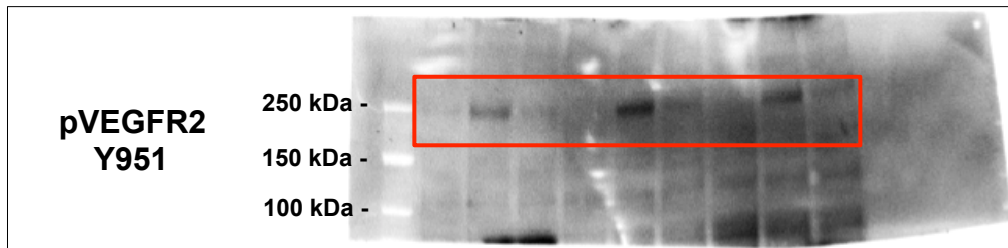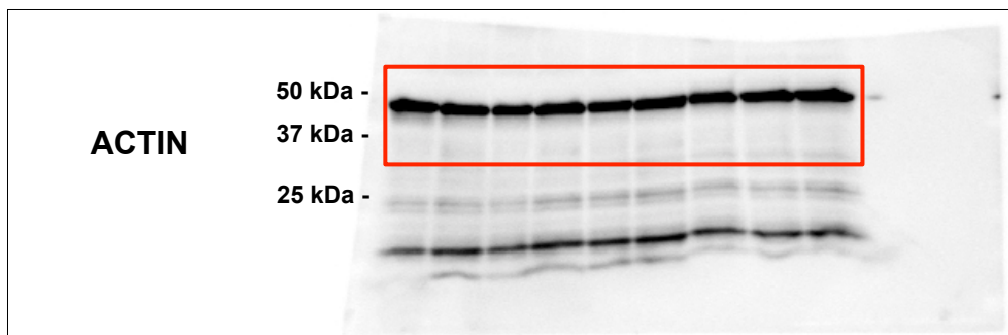

### Uncropped Immunoblots for Fig.5k

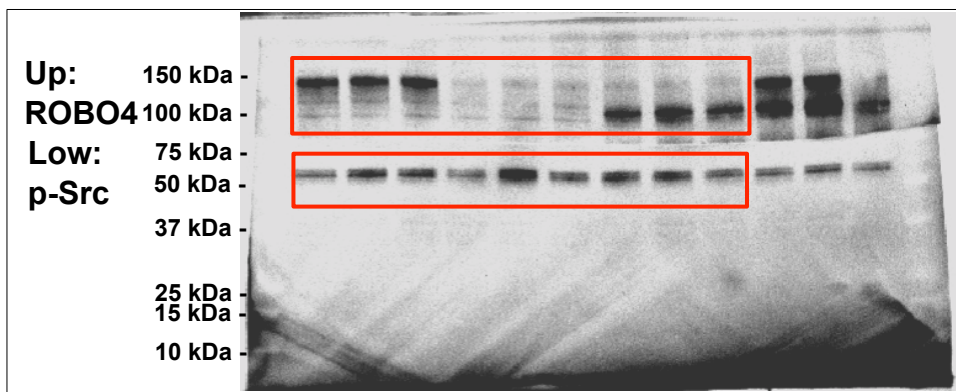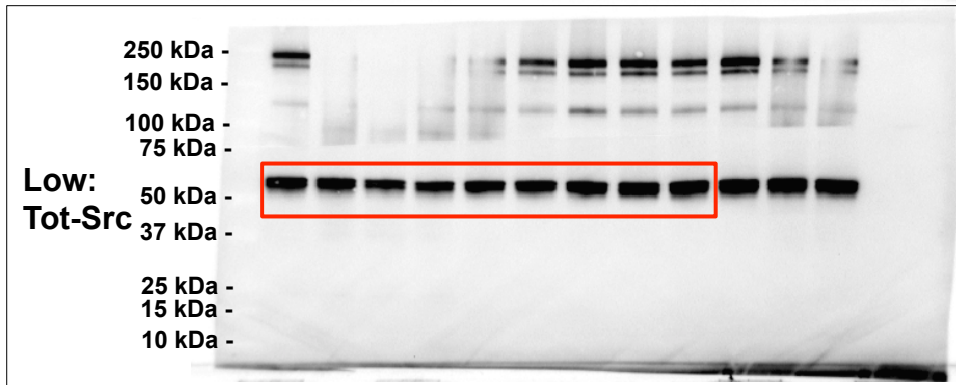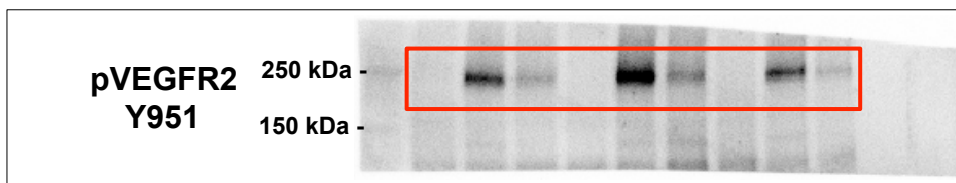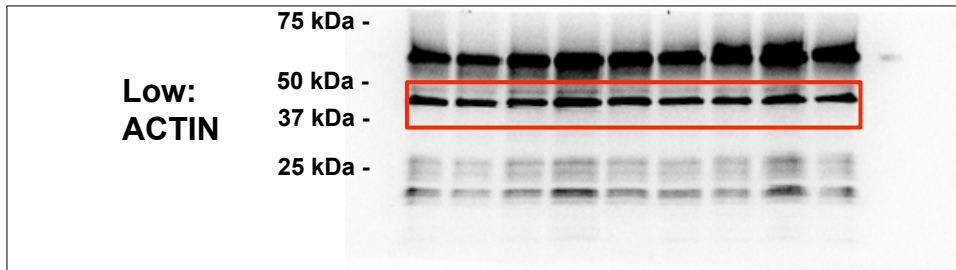

### Uncropped Immunoblots for Fig.5m

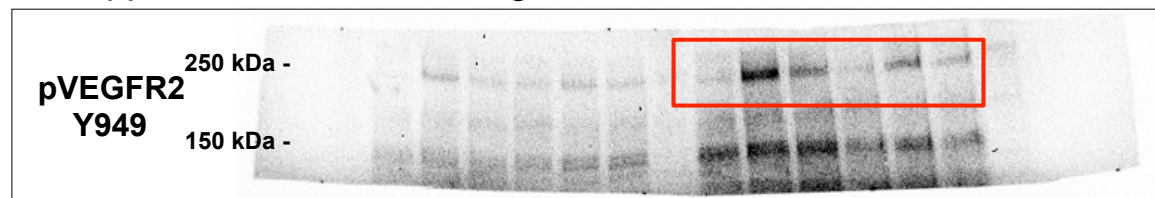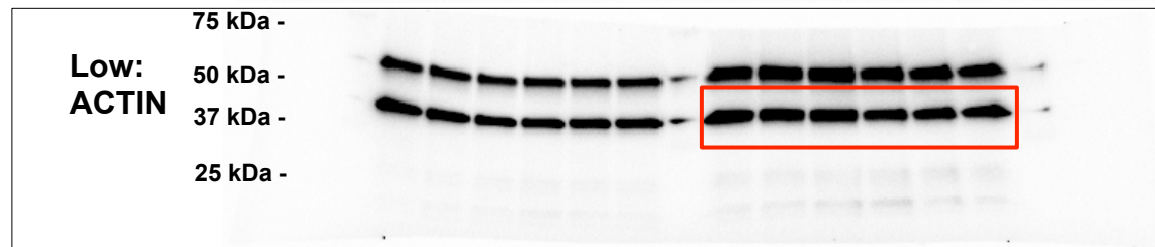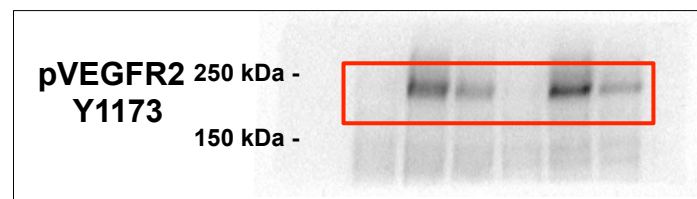

Uncropped Immunoblots for Fig.6b

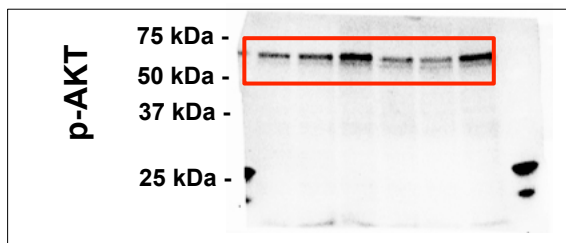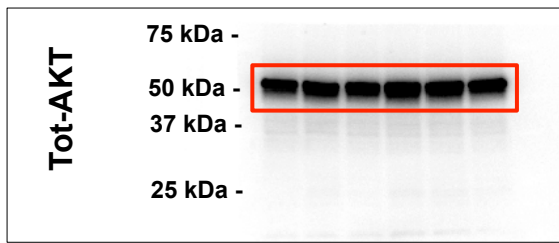

Uncropped Immunoblots for Fig.6c

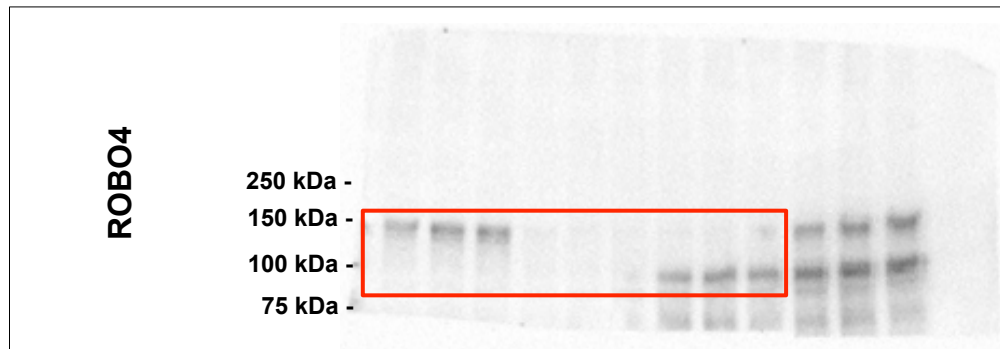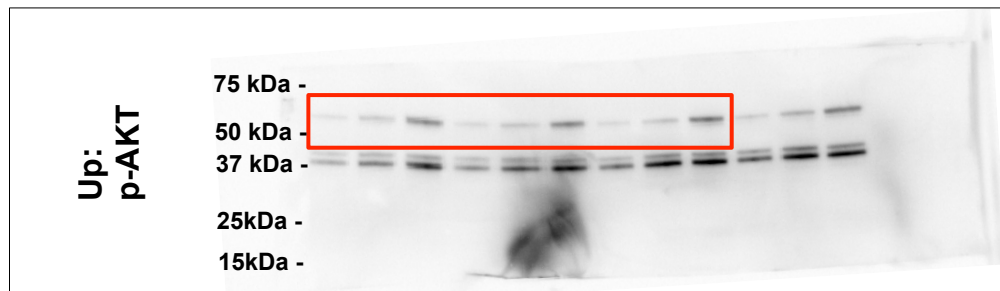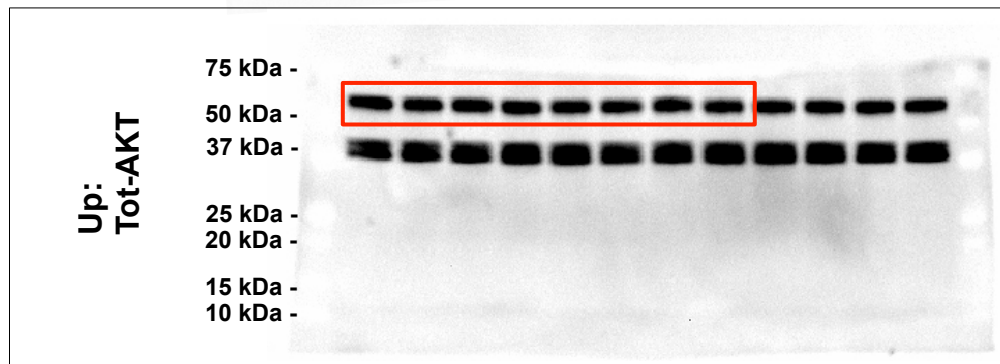

Uncropped Immunoblots for Fig.6e

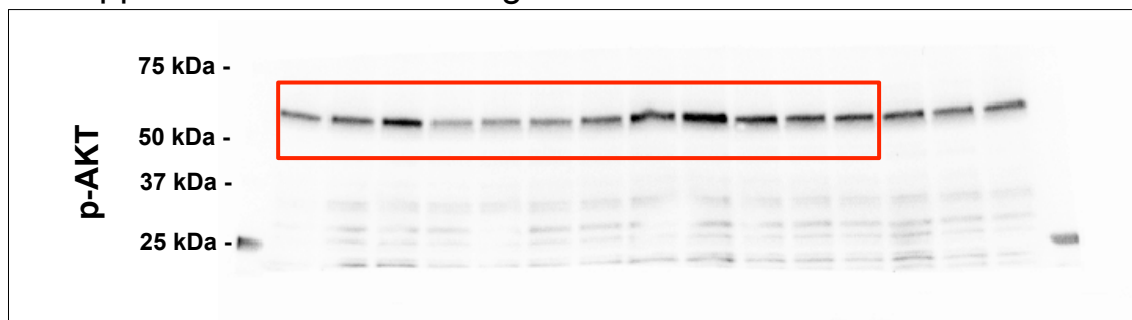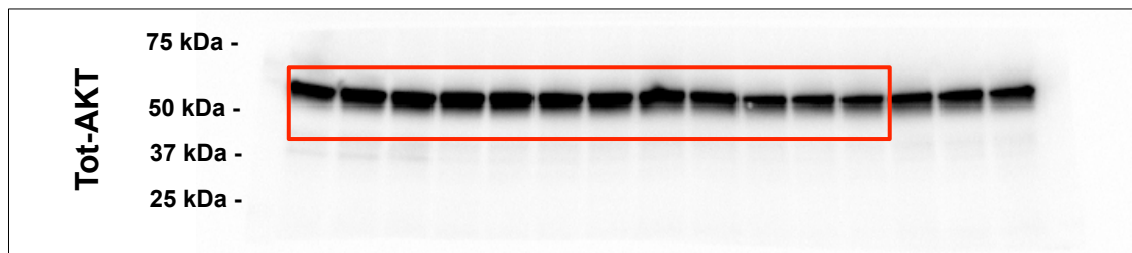

### Uncropped Immunoblots for Fig.7b

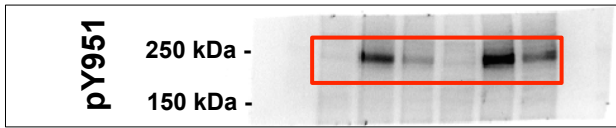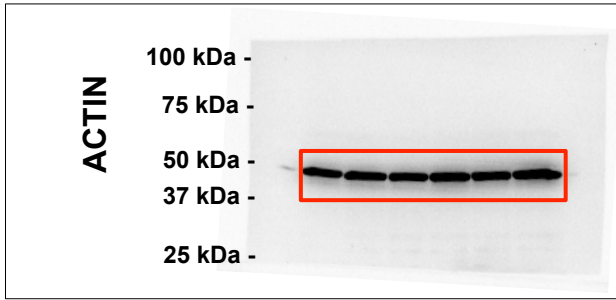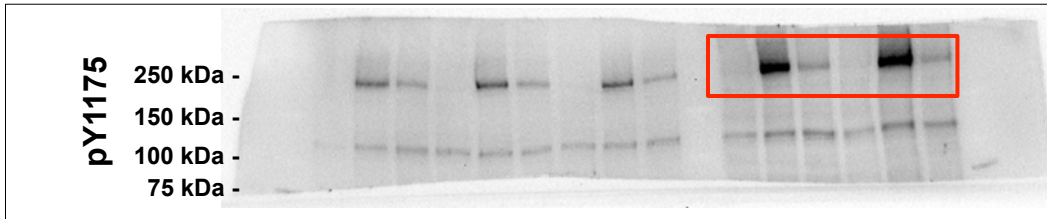

### Uncropped Immunoblots for Fig.7e

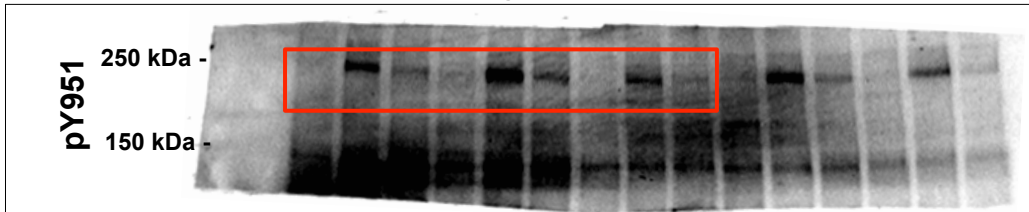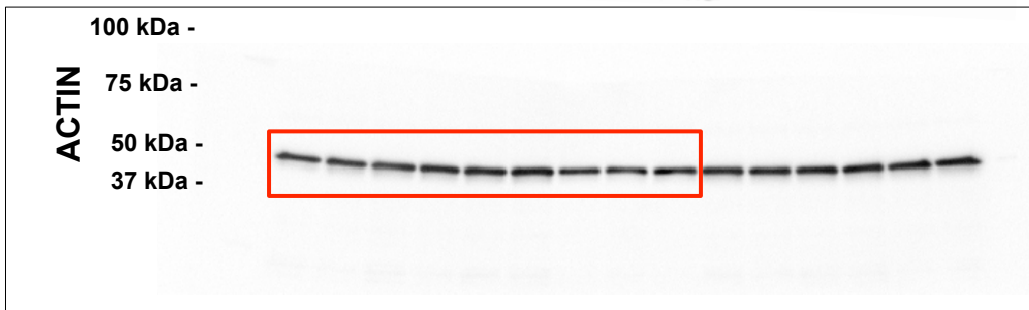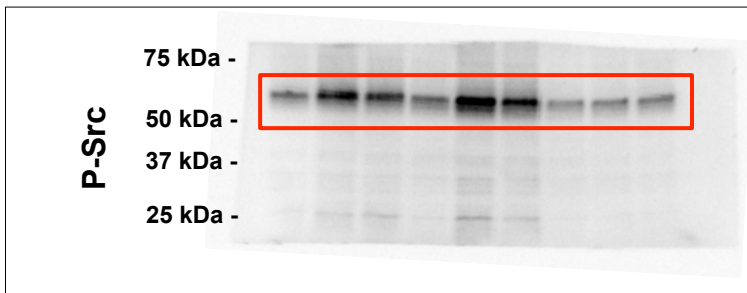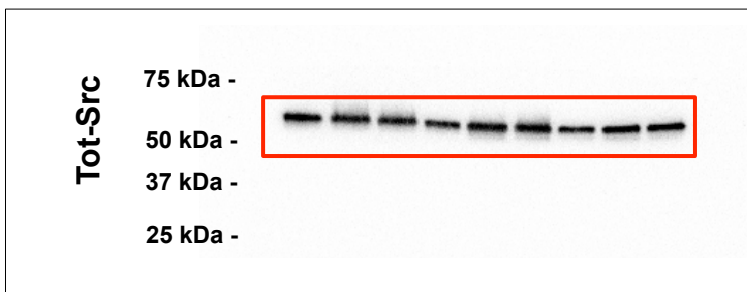



Uncropped Immunoblots for Fig.7g

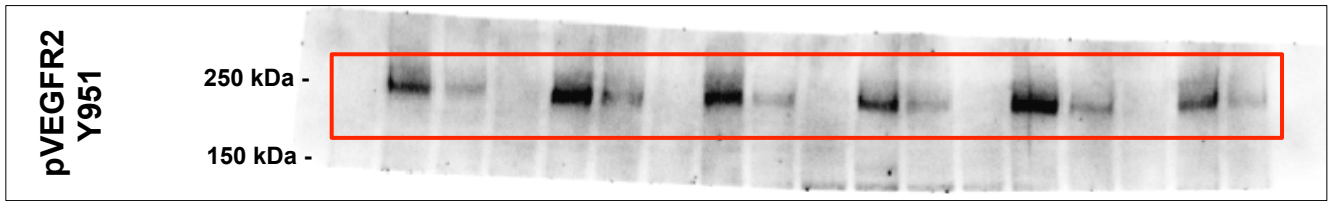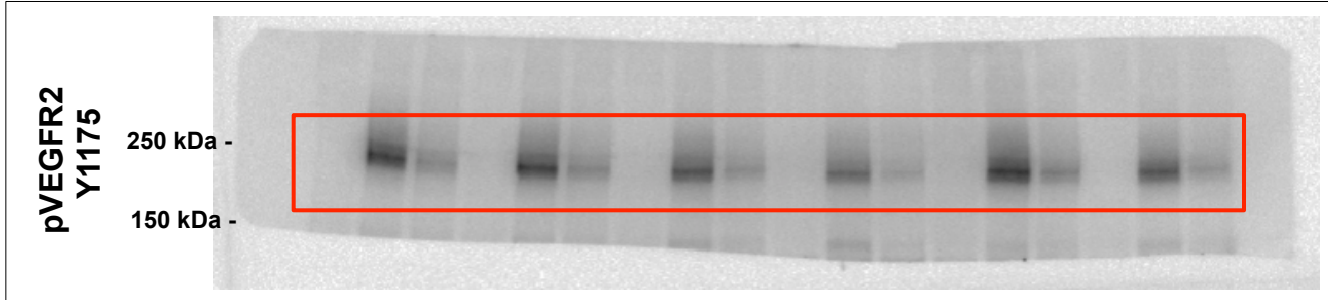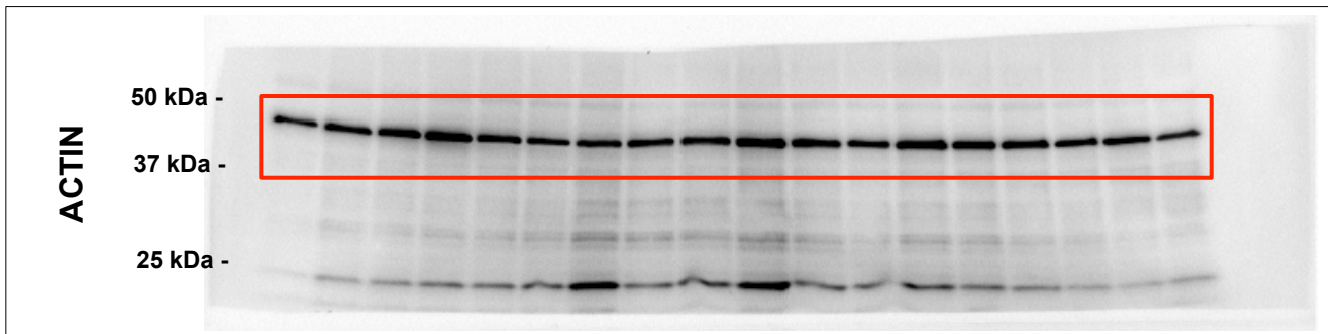

Uncropped Immunoblots for Fig.7i

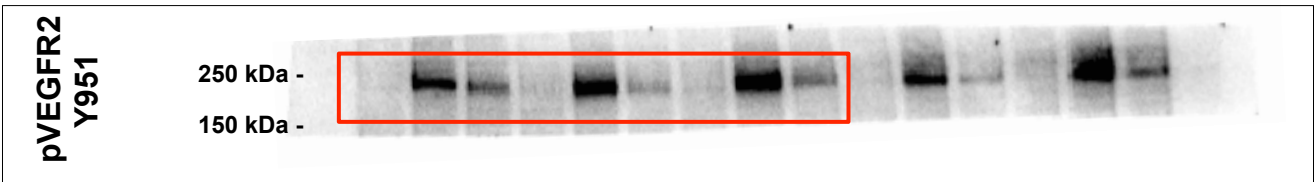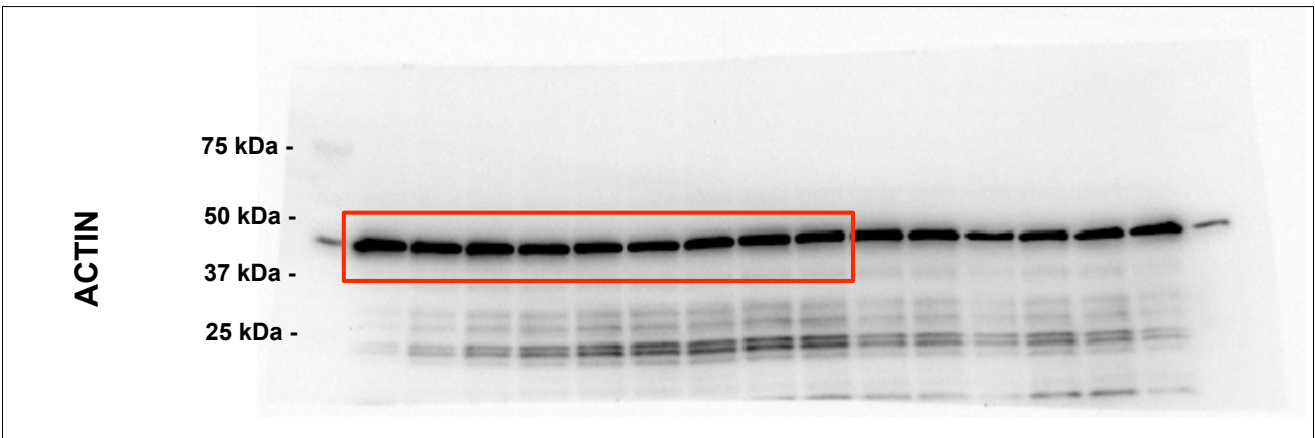



### Uncropped Immunoblots for Supplementary Fig.6a

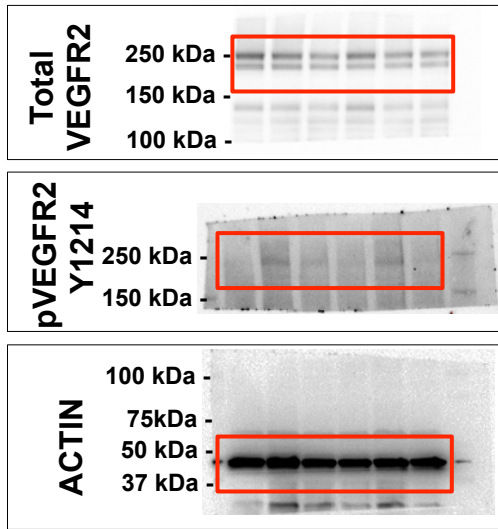

### Uncropped Immunoblots for Supplementary Fig.6b

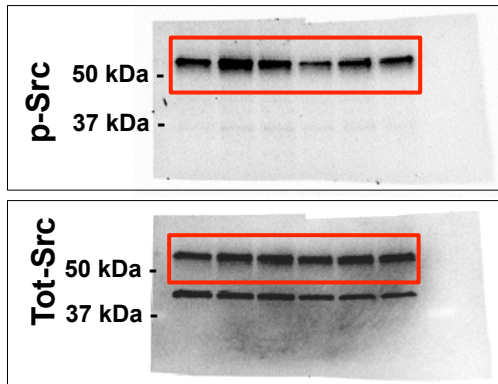

### Uncropped Immunoblots for Supplementary Fig.6c

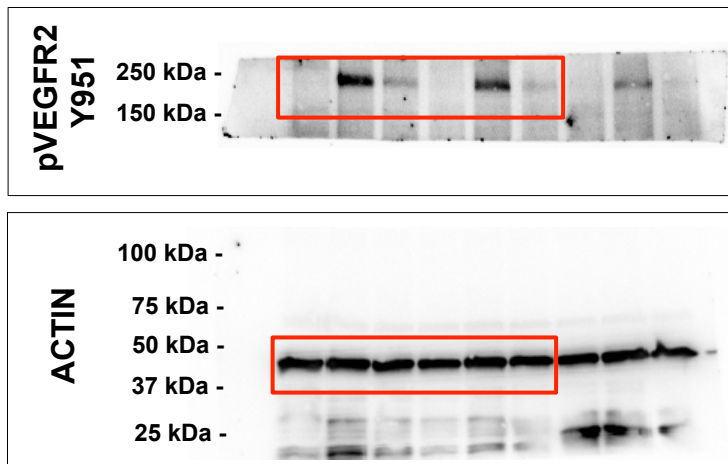

Uncropped Immunoblots for Supplementary Fig.7c

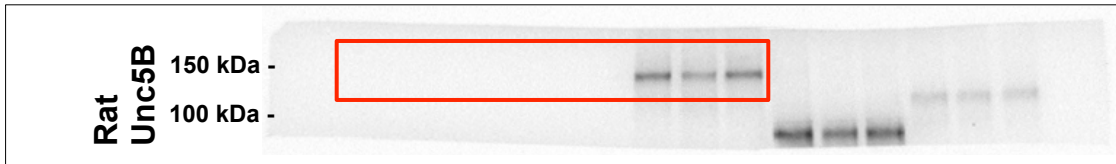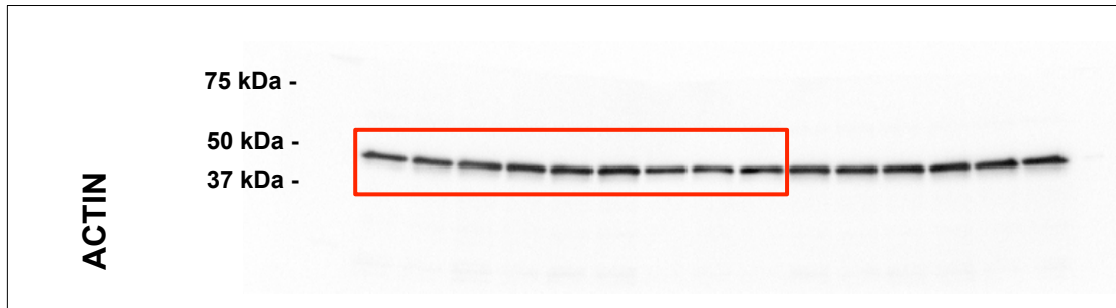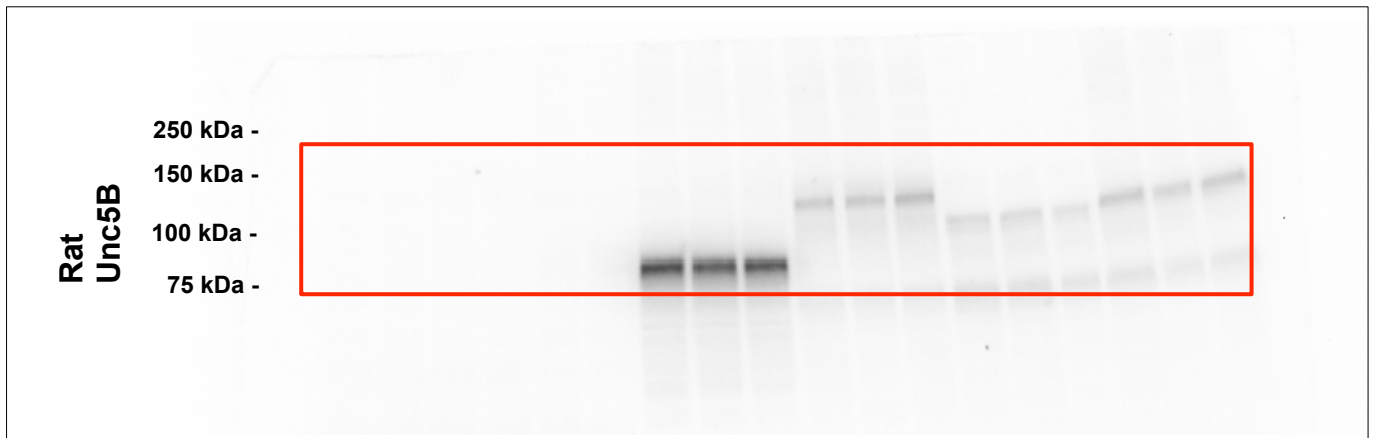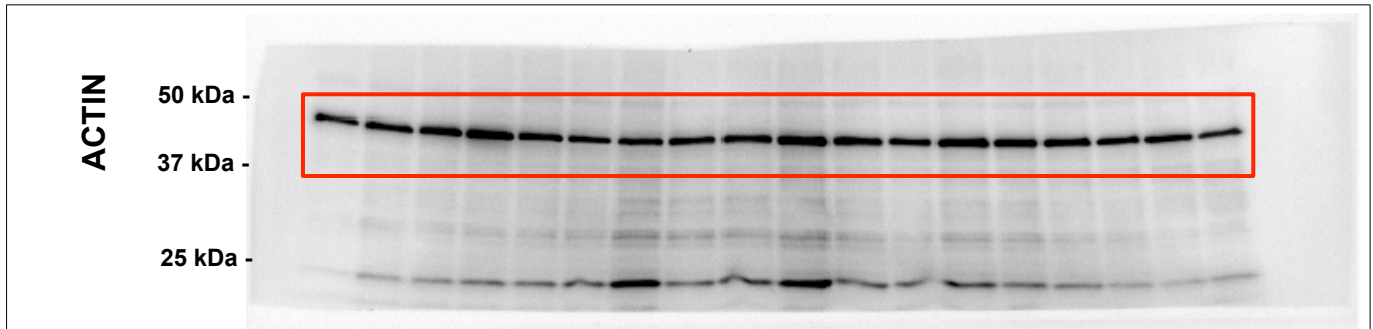

**Supplementary Table 1. siRNA targeting sequences and corresponding sequences in siRNA-resistant constructs.**

| siRNA Targeting Sequences                                                                                                                                 | Location                                  | siRNA-resistant Constructs                                                                                                             |                                                                                                                    |                                                                                                |                                                                                               |
|-----------------------------------------------------------------------------------------------------------------------------------------------------------|-------------------------------------------|----------------------------------------------------------------------------------------------------------------------------------------|--------------------------------------------------------------------------------------------------------------------|------------------------------------------------------------------------------------------------|-----------------------------------------------------------------------------------------------|
| <b>Human ROBO4 SMARTpool siRNAs:</b><br>5'-CCTCAGAGTTCACGGACAT-3'<br>5'-GGGCCAAGACTACGAGTTC-3'<br>5'-GGGAGGATCAAGACAGCGT-3'<br>5'-TAGCTTTGGTTTCGGTCTA-3'  | ECD<br>ECD<br>ICD<br>ICD                  | <b>Mouse Robo4FL</b><br><70% conserved<br>5'-GGGCCAAGACTATGAATTC-3'<br>5'-AGGAGGATCAGGACAGCGT-3'<br>5'-TAGCTTTGGCCTCAGTCTG-3'          | <b>Mouse Robo4ΔCD</b><br><70% conserved<br>GGGCCAAGACTATGAATTC<br>N.A.<br>N.A.                                     |                                                                                                |                                                                                               |
| <b>Human UNC5B SMARTpool siRNAs:</b><br>5'-GACCTTATGCCTTCAAGAT-3'<br>5'-GCCCCGTGACTGGATCTTCC-3'<br>5'-GCGGATACTTGGTGGAGGA-3'<br>5'-GCACATACCCTAGCGATTT-3' | ICD (DD)<br>ICD (ZU5)<br>ICD (UPA)<br>ICD | <b>Rat Unc5BFL</b><br>5'-GACCCTATGCCTTCAAGAT-3'<br>5'-GCCGGAGACTGGATCTTCC-3'<br>5'-GTGGCTACTTGGTGGAGGA-3'<br>5'-GTACATACCCAGGCGATTT-3' | <b>Rat Unc5BΔDD</b><br>N.A.<br>5'-GCCGGAGACTGGATCTTCC-3'<br>5'-GTGGCTACTTGGTGGAGGA-3'<br>5'-GTACATACCCAGGCGATTT-3' | <b>Rat Unc5BΔUPA</b><br>N.A.<br>5'-GCCGGAGACTGGATCTTCC-3'<br>N.A.<br>5'-GTACATACCCAGGCGATTT-3' | <b>Rat Unc5BUPA</b><br>N.A.<br>N.A.<br>5'-GTGGCTACTTGGTGGAGGA-3'<br>5'-GTACATACCCAGGCGATTT-3' |
| <b>Human ROBO1 SMARTpool siRNAs:</b><br>5'-GAATCAGACTGGTTAGTTT-3'<br>5'-GCAGGTACTTGGAGGATAT-3'<br>5'-GAGGGCAGCTAATGCATAT-3'<br>5'-GGATGTATTTGCAACAAGA-3'  | ECD<br>ICD<br>ECD<br>ICD                  | <b>Rat Robo1FL</b><br>5'-GAATCGGAGTGGTTAGTTT-3'<br>5'-GCAAGTACTTGGGGGATTT-3'<br>5'-GAGGGCAGCAATGCCATAT-3'<br>5'-GGATGTATTTGCAACAGGA-3' | <b>Rat Robo1ΔCD</b><br>5'-GAATCGGAGTGGTTAGTTT-3'<br>N.A.<br>5'-GAGGGCAGCAATGCCATAT-3'<br>N.A.                      |                                                                                                |                                                                                               |
| <b>Human ROBO2 SMARTpool siRNAs:</b><br>5'-TCTCAAAGACCTCGACCTA-3'<br>5'-AGTGGATGGTACAGCGTTA-3'<br>5'-GCGCAATGCCAGCGACCTT-3'<br>5'-GGTATGACATCAAAGACGA-3'  |                                           |                                                                                                                                        |                                                                                                                    |                                                                                                |                                                                                               |

Red font: Mis-matched nucleotides in siRNA-resistant constructs compared to the corresponding siRNA targeting sequences. ECD: extracellular domain; ICD: intracellular domain.

**Supplementary Table 2. Genotyping and qPCR primers used in the study**

| <b>Primers</b>                                   | <b>Sequence</b>                                                                                                                                                                                                  | <b>Application</b> |
|--------------------------------------------------|------------------------------------------------------------------------------------------------------------------------------------------------------------------------------------------------------------------|--------------------|
| <i>GFP</i>                                       | Forward: 5'- CCTACGGCGTGCAGTGCTTCAGC-3'<br>Reverse: 5'-CGGCGAGCTGCACGCTGCGTCCTC-3'                                                                                                                               | Genotyping         |
| <i>CDH5-tTA</i>                                  | Forward: 5'-GACGCCTTAGCCATTGAGAT-3'<br>Reverse: 5'-CAGTAGTAGGTGTTCCCTTTCTT-3'                                                                                                                                    | Genotyping         |
| <i>Robo4<sup>-/-</sup></i>                       | WT allele forward: 5'-GTCTGGATCCAAAGCCAGCAGGAC-3'<br>WT allele reverse: 5'-GGGGAGAAGGTCTGAGTCCATAGG-3'<br>KO allele forward: 5'-CAGCGCATCGCCTTCTATCGCCTT-3'<br>KO allele reverse: 5'-CACCTGTCTGTTCTCCACATCGGC-3' | Genotyping         |
| <i>GAPDH</i>                                     | Hs_GAPDH_1_SG QuantiTect Primer Assay (Qiagen, #QT00079247)                                                                                                                                                      | qPCR               |
| <i>ROBO1</i>                                     | Hs_ROBO1_2_SG QuantiTect Primer Assay (Qiagen, #QT01668982)                                                                                                                                                      | qPCR               |
| <i>ROBO2</i>                                     | Hs_ROBO2_1_SG QuantiTect Primer Assay (Qiagen, #QT00200704)                                                                                                                                                      | qPCR               |
| <i>ROBO4</i>                                     | Hs_ROBO4_1_SG QuantiTect Primer Assay (Qiagen, #QT00237741)                                                                                                                                                      | qPCR               |
| <i>UNC5B</i>                                     | Hs_UNC5B_1_SG QuantiTect Primer Assay (Qiagen, #QT00086366)                                                                                                                                                      | qPCR               |
| <i>mRobo4 (mouse Robo4<math>\Delta</math>CD)</i> | Forward: 5'-AATGGTGTCATCCGTGGTTAC-3'<br>Reverse: 5'-AGTTGGCAGCAGGCAATG-3'                                                                                                                                        | qPCR               |

**Supplementary Table 3. Antibodies used in the study**

| <b>Antibody</b>              | <b>Manufacturer</b> | <b>Cat. No.</b> | <b>Working Conc/Dilution</b>   | <b>Application</b>                 |
|------------------------------|---------------------|-----------------|--------------------------------|------------------------------------|
| $\beta$ -Catenin             | BD                  | 610153          | 1 $\mu$ g/ml                   | Immunostaining                     |
| CD31                         | BD                  | 553370          | 1 $\mu$ g/ml                   | Immunostaining & MLEC purification |
| ICAM-2                       | BD                  | 553326          | 1 $\mu$ g/ml                   | MLEC purification                  |
| AKT                          | Cell Signalling     | 4060            | 1:2000                         | Western blot                       |
| phospho-AKT (pS473)          | Cell Signalling     | 4691            | 1:2000                         | Western blot                       |
| Src                          | Cell Signalling     | 2109            | 1:2000                         | Western blot                       |
| phospho-Src (pY416)          | Cell Signalling     | 6943            | 1:2000                         | Western blot                       |
| VEGFR2                       | Cell Signalling     | 9698            | 1:2000                         | Western blot                       |
| phospho-VEGFR2 (pY951)       | Cell Signalling     | 2471            | 1:500                          | Western blot                       |
| phospho-VEGFR2 (pY1175)      | Cell Signalling     | 2478            | 1:1000                         | Western blot                       |
| phospho-VEGFR2 (pY1214)      | Cell Signalling     | 2477            | 1:300                          | Western blot                       |
| Unc5B                        | R&D                 | AF1065          | 1 $\mu$ g/ml                   | Western blot                       |
| Robo4 (goat)                 | R&D                 | BAF2336         | 0.5 $\mu$ g/ml<br>1 $\mu$ g/ml | ELISA<br>Western blot              |
| Robo4 (human) (clone: 71.22) | Genentech           | n.a             | 1 $\mu$ g/ml                   | ELISA & Immunoprecipitation        |
| GFP                          | Life Technologies   | G10362          | 1:500                          | Immunostaining & Western blot      |
| VE-cadherin                  | Santa Cruz          | sc-6458         | 1:1000                         | Western blot                       |
| $\beta$ -Actin               | Sigma-Aldrich       | A1978           | 1:2500                         | Western blot                       |
